# Supplementary material
Source: MDPI journal article supplement (https://www.mdpi.com/2673-5261/4/1/7)
Supplement: s1 [file s1]

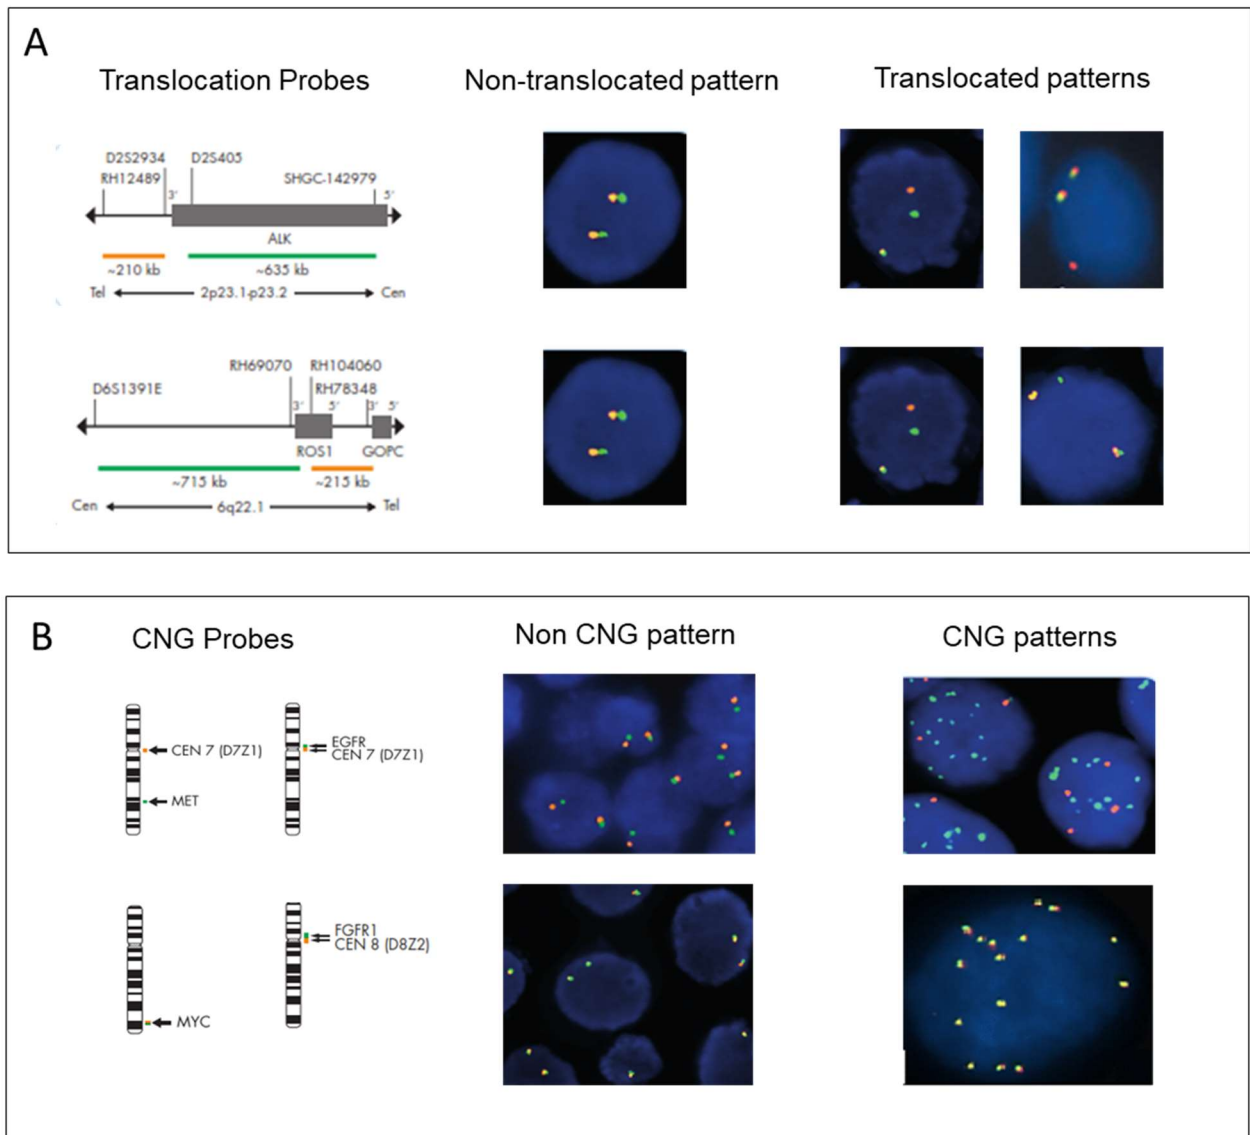

**Figure S1:** (A) Design of ALK and ROS1 probes used for translocation studies and diagrams of the patterns observed in translocated and non-translocated interphase cells. (B) Design of *MET*/CEN7, *EGFR*/CEN7, *FGFR1*/CEN8 and *MYC* probes used for CNG assessment and diagrams of interphase cells with and without CNG patterns.

**Table S1:** FISH probe designs and signal patterns. NA: True amplification can not be assessed with ZytoLight® SPEC MYC Dual Color Break Apart.

| TRANSLOCATION PROBES                       | DESIGN                       | Non-translocated (negative) pattern | Translocated (positive) patterns                                                                                |
|--------------------------------------------|------------------------------|-------------------------------------|-----------------------------------------------------------------------------------------------------------------|
| ZytoLight® SPEC ALK Dual Color Break Apart | 3' end Orange / 5' end Green | Fusion signals (Yellow)             | Split pattern: separate green and orange signals<br>Split pattern with loss of 5' end : separate orange signals |
| ZytoLight® SPEC ROS1 Dual Color Break      | 3' end Green / 5' end Orange | Fusion signals (Yellow)             | Split pattern: separate green and orange signals<br>Split pattern with loss of 5' end : separate green signals  |

| COPY NUMBER GAIN PROBES                    | DESIGN                        | Non-CNG pattern   | CNG pattern        | True Amplification         |
|--------------------------------------------|-------------------------------|-------------------|--------------------|----------------------------|
| ZytoLight® SPEC MET/CEN 7 Dual Color       | locus green /centromer Orange | <5 green signals  | ≥ 5 green signals  | ratio green/red signals >2 |
| ZytoLight® SPEC FGFR1/CEN 8 Dual Color     | locus green /centromer Orange | <5 green signals  | ≥ 5 green signals  | ratio green/red signals >2 |
| ZytoLight® SPEC EGFR/CEN 7 Dual Color      | locus green /centromer Orange | <5 green signals  | ≥ 5 green signals  | ratio green/red signals >2 |
| ZytoLight® SPEC MYC Dual Color Break Apart | 3' end Green / 5' end Orange  | <5 yellow signals | ≥ 5 yellow signals | NA                         |

**Table S2:** Further details on percentage of cells with alterations and number of interphase cells counted for each sample passage.

| Sample       | Passage | Alteration         | % Translocated/amplified cells | Number of interphase cells counted |
|--------------|---------|--------------------|--------------------------------|------------------------------------|
| Sample 1     | 2       | <i>ALK</i> fusion  | 50                             | 73                                 |
| Sample 1     | 3       | <i>ALK</i> fusion  | 17                             | 55                                 |
| Sample 1     | 5       | <i>ALK</i> fusion  | 50                             | 53                                 |
| Sample 1     | 8       | <i>ALK</i> fusion  | 90                             | 100                                |
| Sample 1     | 9       | <i>ALK</i> fusion  | 75                             | 58                                 |
| Sample 1     | 11      | <i>ALK</i> fusion  | 65                             | 84                                 |
| Sample 1     | 13      | <i>ALK</i> fusion  | 50                             | 69                                 |
| Sample 2     | 2       | <i>ALK</i> fusion  | 50                             | 61                                 |
| Sample 2     | 3       | <i>ALK</i> fusion  | 72                             | 58                                 |
| Sample 2     | 5       | <i>ALK</i> fusion  | 37                             | 52                                 |
| Sample 11    | 1       | <i>ROS1</i> fusion | 9                              | 181                                |
| Sample 11    | 2       | <i>ROS1</i> fusion | 87                             | 98                                 |
| Sample 11    | 5       | <i>ROS1</i> fusion | 78                             | 83                                 |
| Sample 11    | 7       | <i>ROS1</i> fusion | 99                             | 120                                |
| Sample 12 AC | 1       | <i>ROS1</i> fusion | 76                             | 190                                |
| Sample 12 AC | 2       | <i>ROS1</i> fusion | 99                             | 110                                |
| Sample 12 AC | 5       | <i>ROS1</i> fusion | 100                            | 100                                |
| Sample 12 FC | 1       | <i>ROS1</i> fusion | 100                            | 112                                |
| Sample 12 FC | 2       | <i>ROS1</i> fusion | 100                            | 119                                |
| Sample 12 FC | 5       | <i>ROS1</i> fusion | 100                            | 110                                |
| Sample 1     | 5       | <i>MET</i> CNG     | 77                             | 30                                 |
| Sample 1     | 8       | <i>MET</i> CNG     | 50                             | 60                                 |
| Sample 1     | 9       | <i>MET</i> CNG     | 53                             | 60                                 |
| Sample 1     | 11      | <i>MET</i> CNG     | 27                             | 60                                 |
| Sample 1     | 13      | <i>MET</i> CNG     | 5                              | 60                                 |
| Sample 2     | 2       | <i>MET</i> CNG     | 27                             | 60                                 |
| Sample 2     | 3       | <i>MET</i> CNG     | 7                              | 50                                 |
| Sample 2     | 5       | <i>MET</i> CNG     | 10                             | 60                                 |
| Sample 5     | 2       | <i>MET</i> CNG     | 100                            | 30                                 |
| Sample 5     | 3       | <i>MET</i> CNG     | 100                            | 30                                 |
| Sample 6 AC  | 1       | <i>MET</i> CNG     | 36                             | 162                                |
| Sample 6 AC  | 2       | <i>MET</i> CNG     | 20                             | 230                                |
| Sample 6 FC  | 1       | <i>MET</i> CNG     | 81                             | 171                                |
| Sample 6 FC  | 2       | <i>MET</i> CNG     | 96                             | 168                                |
| Sample 6 FC  | 8       | <i>MET</i> CNG     | 100                            | 37                                 |
| Sample 7     | 1       | <i>MET</i> CNG     | 0                              | 30                                 |
| Sample 8     | 1       | <i>MET</i> CNG     | 20                             | 30                                 |
| Sample 8     | 3       | <i>MET</i> CNG     | 0                              | 30                                 |
| Sample 3     | 1       | <i>EGFR</i> CNG    | 100                            | 30                                 |
| Sample 4     | 1       | <i>FGFR1</i> CNG   | 67                             | 30                                 |
| Sample 4     | 3       | <i>FGFR1</i> CNG   | 70                             | 60                                 |
| Sample 9     | 1       | <i>MYC</i> CNG     | 72                             | 117                                |
| Sample 9     | 2       | <i>MYC</i> CNG     | 63                             | 60                                 |
| Sample 9     | 6       | <i>MYC</i> CNG     | 90                             | 30                                 |
| Sample 10    | 2       | <i>MYC</i> CNG     | 100                            | 79                                 |
| Sample 10    | 6       | <i>MYC</i> CNG     | 100                            | 60                                 |

**Table S3.** Further details of the patients and samples included in the study. The methods used for the initial detection of fusions/CNGs in the same patient (in previous FFPE biopsies, cytological specimens or fluid supernatants) are indicated in the third column. After collecting the ascites or pleural effusions used to initiate the primary cultures, the number of positive cells present in the fluid was determined by FISH, when possible. The results are listed in the fourth column. If the fluid sample was small or the number of cells very limited, the entire sample was employed for initiation of the primary culture and FISH was performed at later passages. These cases are indicated by “ND”.

| Sample | Known Fusion/CNGs in previous material | Method used in previous material | % of Cells with fusion/CNG in fluid by FISH (passage 1) |
|--------|----------------------------------------|----------------------------------|---------------------------------------------------------|
| 1      | <i>ALK</i> fusion / <i>MET</i> CNG     | FISH                             | ND                                                      |
| 2      | <i>ALK</i> fusion / <i>MET</i> CNG     | FISH                             | ND                                                      |
| 3      | <i>EGFR</i> CNG                        | FISH                             | 100%                                                    |
| 4      | <i>FGFR1</i> CNG                       | NGS                              | 90%                                                     |
| 5      | <i>MET</i> CNG                         | FISH                             | ND                                                      |
| 6      | <i>MET</i> CNG                         | NGS                              | 81%                                                     |
| 7      | <i>MET</i> CNG                         | FISH                             | 0%                                                      |
| 8      | <i>MET</i> CNG                         | FISH +IHC                        | 20%                                                     |
| 9      | <i>MYC</i> CNG                         | NGS                              | ND                                                      |
| 10     | <i>MYC</i> CNG                         | NGS                              | ND                                                      |
| 11     | <i>ROS1</i> fusion                     | FISH                             | 9%                                                      |
| 12     | <i>ROS1</i> fusion                     | FISH                             | 76%                                                     |

**Table S4.** Quality control (QC) parameters of the NGS analyses presented in Table 4.

| Sample      | Passage | Mean coverage depth | Percentage of targets coverage over 100 reads | Percentage of targets coverage under 20 reads | Results of NGS |            |
|-------------|---------|---------------------|-----------------------------------------------|-----------------------------------------------|----------------|------------|
| Sample 1    | 5       | 725                 | 98.54                                         | 1.46                                          | MET            | 10 copies  |
| Sample 1    | 11      | 952                 | 99.84                                         | 0.16                                          | ND             | ND         |
| Sample 2    | 2       | 536                 | 98.02                                         | 1.98                                          | MET            | NA         |
| Sample 3    | 1       | 849                 | 99.92                                         | 0.08                                          | EGFR           | 5 copies   |
| Sample 4    | 1       | 578                 | 98.59                                         | 0.61                                          | FGFR1          | 16 copies  |
| Sample 5    | 2       | 913                 | 99.95                                         | 0.05                                          | ND             | ND         |
| Sample 6 FC | 1       | 348                 | 97.50                                         | 2.50                                          | MET            | >50 copies |
| Sample 7    | 1       | 410                 | 98.51                                         | 0.51                                          | ND             | ND         |
| Sample 8    | 1       | 840                 | 99.73                                         | 0.11                                          | ND             | ND         |
| Sample 9    | 2       | 1039                | 99.25                                         | 0.26                                          | MYC            | 7 copies   |
| Sample 10   | 2       | 141                 | 70.39                                         | 10.58                                         | MYC            | >50 copies |
